# Supplementary material
Source: PubMed Central journal article supplement (PMC4603596)
Supplement: supp_WNL.0000000000001815_e-tables.pdf [file supp_WNL.0000000000001815_e-tables.pdf]

Table e-1. Multivariable analyses of the associations between baseline hypertension, hypertriglyceridemia status, hypercholesterolemia, overweight and cognitive performances, ANRS CO3 Aquitaine cohort, 2007-2009 (Linear regression adjusted for gender, sex, education, HIV transmission groups, AIDS stage, CES-D score)

|                                | Hypertension*   |                 |         | Hypertriglyceridemia† |                 |         |
|--------------------------------|-----------------|-----------------|---------|-----------------------|-----------------|---------|
|                                | No<br>N=317     | Yes<br>N=78     | P value | No<br>N=196           | Yes<br>N=201    | P value |
| <b>COGNITIVE TESTS</b>         | <b>Mean(SE)</b> | <b>Mean(SE)</b> |         | <b>Mean(SE)</b>       | <b>Mean(SE)</b> |         |
| TMT part A                     | 1.72 (0.038)    | 1.66 (0.08)     | 0.53    | 1.72(0.05)            | 1.69(0.05)      | 0.70    |
| TMT part B                     | 4.72 (0.24)     | 4.64(0.50)      | 0.88    | 4.76(0.31)            | 4.67(0.31)      | 0.83    |
| DSST score                     | 44.9 (0.61)     | 44.1(1.3)       | 0.54    | 45.8(0.79)            | 43.9(0.78)      | 0.09    |
| FCSRT - immediate recall score | 31.0 (0.35)     | 31.0(0.74)      | 0.99    | 31.3(0.46)            | 30.7(0.45)      | 0.38    |
| FCSRT - delayed recall score   | 12.3 (0.13)     | 12.4(0.27)      | 0.76    | 12.4(0.17)            | 12.3(0.16)      | 0.56    |
| IST score 30 seconds           | 47.6 (0.52)     | 46.5 (1.1)      | 0.39    | 47.1(0.67)            | 47.6(0.66)      | 0.64    |
| ROCT – Copy score              | 32.4 (0.25)     | 32.4 (0.51)     | 0.96    | 32.9(0.31)            | 31.9(0.31)      | 0.04    |
| ROCT – Recall score            | 17.7 (0.33)     | 17.7 (0.68)     | 0.94    | 17.3(0.43)            | 18.2(0.42)      | 0.14    |
| Digit span score               | 4.1 (0.07)      | 4.1 (0.14)      | 0.79    | 4.1(0.09)             | 4.1(0.09)       | 0.95    |
| PPT score                      | 175.8 (1.5)     | 174.5 (3.2)     | 0.72    | 175.9(1.9)            | 175.1(1.9)      | 0.77    |

Abbreviations: TMT (Trail Making Test), DSST (Digit Symbol Substitution Test), FCRS (Free and Cued selective reminding test), IST (Isaac Set Test), ROCT (Rey Osterrieth Complex Figure), Purdue Pegboard Test (PPT);

\* Hypertension was characterized by systolic blood pressure (SBP)  $\geq 140$ mmHg, or diastolic blood pressure  $\geq 90$ mmHg, or antihypertensive drug intake

† Hypertriglyceridemia was defined by triglycerides plasma level  $>2.2$  mmol/l at two consecutive measures.

Table e-1 (continued). Multivariable analyses of the associations between baseline hypertension, hypertriglyceridemia status, hypercholesterolemia, overweight and cognitive performances, ANRS CO3 Aquitaine cohort, 2007-2009 (Linear regression adjusted for gender, sex, education, HIV transmission groups, AIDS stage, CES-D score)

|                                | Hypercholesterolemia* |                  |         | Overweight†     |                 |         |
|--------------------------------|-----------------------|------------------|---------|-----------------|-----------------|---------|
|                                | No                    | Yes              | P value | No              | Yes             | P value |
|                                | 224                   | 173              |         | 288             | 112             |         |
| <b>COGNITIVE TESTS</b>         | <b>Mean(SE)</b>       | <b>Mean (SE)</b> |         | <b>Mean(SE)</b> | <b>Mean(SE)</b> |         |
| TMT part A                     | 1.71 (0.05)           | 1.71(0.05)       | 0.98    | 1.66 (0.42)     | 1.74 (0.07)     | 0.19    |
| TMT part B                     | 4.75 (0.29)           | 4.68 (0.34)      | 0.87    | 4.51 (0.26)     | 5.14 (0.42)     | 0.21    |
| DSST score                     | 45.4 (0.75)           | 44.0 (0.86)      | 0.24    | 45.2 (0.67)     | 43.3 (1.08)     | 0.14    |
| FCSRT - immediate recall score | 31.0 (0.43)           | 30.9 (0.49)      | 0.82    | 31.1 (0.38)     | 30.6 (0.62)     | 0.48    |
| FCSRT - delayed recall score   | 12.3 (0.16)           | 12.4 (0.18)      | 0.92    | 13.1 (0.15)     | 13.0 (0.26)     | 0.69    |
| IST score 30 seconds           | 47.4 (0.63)           | 47.3 (0.72)      | 0.93    | 47.5 (0.56)     | 46.2 (0.92)     | 0.19    |
| ROCT – Copy score              | 32.8 (0.29)           | 31.9 (0.34)      | 0.07    | 32.8 (0.26)     | 31.8 (0.43)     | 0.06    |
| ROCT – Recall score            | 17.7 (0.40)           | 17.9 (0.46)      | 0.71    | 18.0 (0.36)     | 17.5 (0.58)     | 0.51    |
| Digit span score               | 4.1 (0.09)            | 4.1 (0.09)       | 0.95    | 4.2 (0.07)      | 4.0 (0.12)      | 0.11    |
| PPT score                      | 176 (1.9)             | 175 (1.9)        | 0.77    | 175 (1.6)       | 176 (2.6)       | 0.84    |

Abbreviations: TMT (Trail Making Test), DSST (Digit Symbol Substitution Test), FCRS (Free and Cued selective reminding test), IST (Isaac Set Test), ROCT (Rey Osterrieth Complex Figure), Purdue Pegboard Test (PPT); SE (Standard error)

\* High cholesterol was defined by plasma cholesterol >6.24 mmol/l on  $\geq 2$  consecutive measures or any use of lipid-lowering drugs;

† Body mass index (BMI) was computed as the ratio of weight (kg) to the square of height (m<sup>2</sup>), and overweight was defined as BMI $\geq 25$

Table e-2. Multivariable analysis of the association between glycaemia status at baseline and neurocognitive impairment (NCI) severity at baseline

|                                             | <b>Glycaemia status at baseline</b> |                                              |                                 |
|---------------------------------------------|-------------------------------------|----------------------------------------------|---------------------------------|
|                                             | Normal<br>N=328<br>OR* (95% CI)     | Impaired<br>glycaemia<br>N=33<br>OR (95% CI) | Diabetes<br>N=39<br>OR (95% CI) |
| <b>NCI severity at baseline<sup>†</sup></b> |                                     |                                              |                                 |
| Normal (N=166)                              | -                                   | -                                            | -                               |
| ANI (N=83)                                  | 1                                   | 1.9 (0.6-5.7)                                | 1.5 (0.6-3.9)                   |
| MND (N=124)                                 | 1                                   | 3.4 (1.3-9.1)                                | 1.1 (0.4-2.9)                   |
| HAD (N=27)                                  | 1                                   | 1.6 (0.2-15.5)                               | 6.5 (1.9-21.7)                  |

\* Polytomous regression adjusted for gender, sex, education, HIV transmission groups, AIDS stage, CES-D score and cardiovascular risk factors

<sup>†</sup> Defined according to Antinori classification; ANI (Asymptomatic cognitive impairment), MND (Mild cognitive impairment), HAD (HIV associated dementia)

Table e-3. Multivariable analysis of the association between glycaemia status at baseline and neurocognitive impairment severity at two year follow-up

|                                           | Glycaemia status at baseline      |                                                |                                   |
|-------------------------------------------|-----------------------------------|------------------------------------------------|-----------------------------------|
|                                           | Normal<br>(N=232)<br>OR* (95% CI) | Impaired<br>glycaemia<br>(N=23)<br>OR (95% CI) | Diabetes<br>(N=26)<br>OR (95% CI) |
| <b>NCI severity at 2-year follow up †</b> |                                   |                                                |                                   |
| Normal (N=117)                            | 1                                 | 1                                              | 1                                 |
| ANI (N=67)                                | 1                                 | 0.6 (0.6-5.7)                                  | 2.4 (0.7-7.8)                     |
| MND (N=87)                                | 1                                 | 0.7 (0.2-2.2)                                  | 2.1 (0.6-7.0)                     |
| HAD (N=10)                                | 1                                 | -                                              | 9.4 (1.2-76.0)                    |

\* Polytomous regression adjusted for gender, sex, education, HIV transmission groups, AIDS stage, CES-D score and cardiovascular risk factors

† Defined according to Antinori classification: ANI (Asymptomatic cognitive impairment), MND (Mild cognitive impairment), HAD (HIV associated dementia)
